# Puzzle of Life

Raymond C. Roy, M.D., Ph.D.\*

## C CONCEPTION AND Misconception

|                    |                            |                  |
|--------------------|----------------------------|------------------|
| I                  | Embryonic cell DNA and RNA | I                |
| Inspire,           | Organogenesis              | Aspire,          |
| Inspire a spirit,  | Homeostasis                | Aspire a spirit, |
| Am an inspiration  | Persona                    | Am an aspiration |
| That persists 'til | Apoptosis                  | That desists,    |
| No longer          | Organ pathogenesis         | Never            |
| I                  | Necrotic cellular detritus | I                |

\* Wake Forest University School of Medicine, Department of Anesthesiology, Winston-Salem, North Carolina. rroy@wfubmc.edu  
Accepted for publication June 24, 2010.

Copyright © 2011, the American Society of Anesthesiologists, Inc. Lippincott Williams & Wilkins. Anesthesiology 2011; 114: 460
